# Supplementary material
Source: PubMed Central journal article supplement (PMC2756440)
Supplement: tjp0587-4091-SD1.pdf [file tjp0587-4091-SD1.pdf]

## Supplemental figure 1

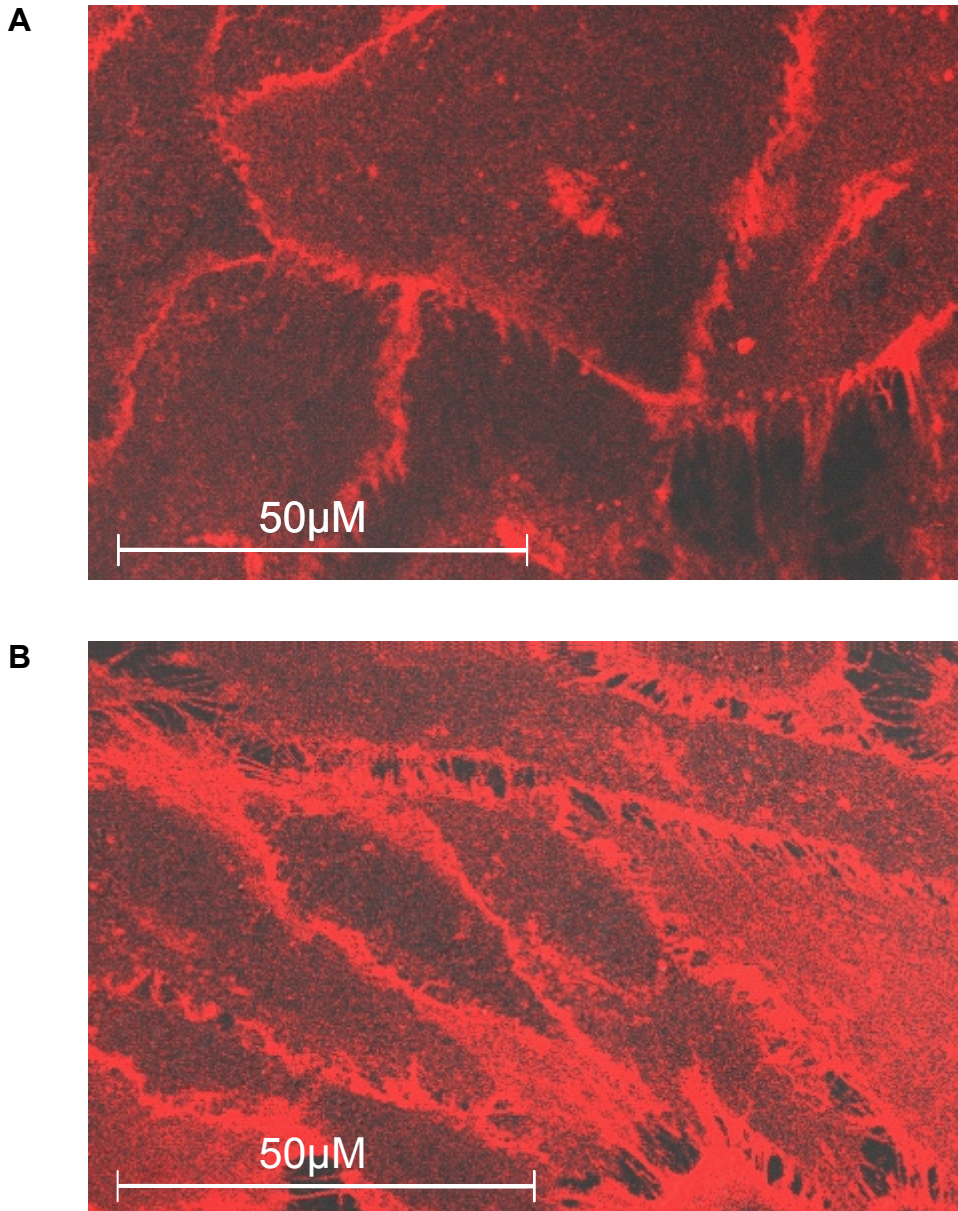

Staining of non-transfected HUVECs (A) and HUVECs double-transfected with siRNA and plasmid (B) with human VE-Cadherin antibody demonstrated that double-transfected HUVECs still form monolayers with typical VE-Cadherin distribution at intercellular junctions like non-transfected cells.

## Supplemental figure 2

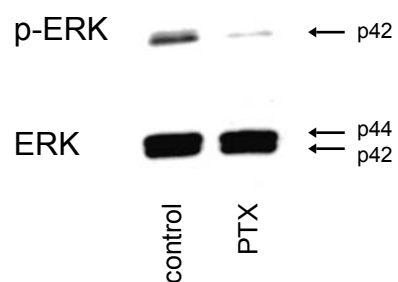

PTX effectively inhibited  $G_i$  protein as confirmed in p-ERK western blot assays. Phosphorylation of ERK was highly attenuated in PTX-treated HUVECs compared to non-treated control cells ( $26.7 \pm 5.4\%$ ;  $n=3$ ).
